# Supplementary material for: Cutibacterium acnes inhibits Staphylococcus lugdunensis biofilm formation through inhibition of autolysis and purine biosynthesis
Source: Research Square preprint supplement (doi:10.21203/rs.3.rs-8408722/v1), 2026-01-21
Supplement: Supplementary file 1 [file e1498f64b7eb43863995bcdc.docx]

**Supplementary Tables**

**Table S1. Bacterial strains used in this study.**

| **Strain** | **Identification** | **Isolation site** |
| --- | --- | --- |
| ATCC 11827 | *Cutibacterium acnes* | Not available |
| ATCC 6919 | *Cutibacterium acnes* | Facial acne |
| ATCC 29399 | *Cutibacterium acnes* | Healthy skin |
| ATCC 43809 | *Staphylococcus lugdunensis* | Axillary lymph node |

**Table S2. Primers designed in this study used in gene expression analyses by RT-qPCR.**

| Primers | Foward primer (5’->3’) | Reverse primer (3’->5’) |
| --- | --- | --- |
| *aroE* | TGATACTAGGTGCTGGAGGTG | TGTCGTTCAGCGGTTTCCAATG |
| *gua*A | ATTGCTGACAGCCCAAGCAC | TCCATAGTCCACTCGCCAGTAC |
| *lrgA* | CTGAAGCTGGCATTGGAAACG | GCTCATGGTCAGTCTGTTGTGTC |

**Table S3- *S. lugdunensis* genes differentially repressed by *C. acnes* cell-free conditioned media (CFCM).**

| Gene | Product | fold | pvalue |
| --- | --- | --- | --- |
| *lrgA* | antiholin-like murein hydrolase modulator LrgA | 31.82 | 2.90E-44 |
| pgap_annot_000718 | ABC transporter permease | 10.34 | 1.33E-38 |
| pgap_annot_000717 | ABC transporter ATP-binding protein | 9.04 | 8.45E-85 |
| *lrgB* | antiholin-like protein LrgB | 7.87 | 3.44E-22 |
| pgap_annot_000720 | beta-class phenol-soluble modulin | 6.90 | 7.44E-18 |
| pgap_annot_002160 | amidohydrolase family protein | 5.23 | 1.06E-41 |
| pgap_annot_000721 | beta-class phenol-soluble modulin | 4.77 | 8.62E-06 |
| pgap_annot_000541 | YhgE/Pip domain-containing protein | 4.39 | 1.05E-58 |
| pgap_annot_000719 | beta-class phenol-soluble modulin | 3.89 | 1.62E-06 |
| pgap_annot_000875 | winged helix-turn-helix transcriptional regulator | 3.82 | 4.20E-42 |
| pgap_annot_000876 | pseudouridine-5'-phosphate glycosidase | 3.38 | 5.90E-38 |
| pgap_annot_000809 | YSIRK-type signal peptide-containing protein | 3.17 | 0.00217754 |
| *argG* | argininosuccinate synthase | 3.13 | 6.09E-17 |
| *argH* | argininosuccinate lyase | 3.03 | 2.47E-10 |
| *nupC* | NupC/NupG family nucleoside CNT transporter | 3.03 | 3.59E-26 |
| pgap_annot_000968 | tryptophan-rich sensory protein | 3.02 | 8.83E-11 |
| pgap_annot_001593 | hypothetical protein | 2.72 | 3.37E-09 |
| pgap_annot_000709 | CidA/LrgA family protein | 2.67 | 2.96E-11 |
| pgap_annot_000484 | ABC transporter permease | 2.62 | 5.67E-11 |
| pgap_annot_000731 | hypothetical protein | 2.59 | 5.49E-09 |
| *vraX* | C1q-binding complement inhibitor VraX | 2.59 | 2.12E-10 |
| *carA* | carbamoyl phosphate synthase small subunit | 2.48 | 7.44E-20 |
| *pyrC* | dihydroorotase | 2.42 | 8.95E-18 |
| pgap_annot_000483 | ABC transporter ATP-binding protein | 2.40 | 1.83E-14 |
| pgap_annot_002103 | aspartate kinase | 2.34 | 6.29E-10 |
| pgap_annot_001371 | mobilization protein | 2.34 | 6.97E-05 |
| pgap_annot_000708 | LrgB family protein | 2.29 | 3.66E-20 |
| pgap_annot_000075 | ABC transporter substrate-binding protein/permease | 2.21 | 2.24E-10 |
| pgap_annot_000967 | glycosyl-4%2C4'-diaponeurosporenoate acyltransferase | 2.20 | 1.94E-07 |
| pgap_annot_002390 | N-acetyltransferase | 2.19 | 0.00232091 |
| *pyrB* | aspartate carbamoyltransferase catalytic subunit | 2.18 | 1.23E-10 |
| pgap_annot_000540 | MarR family transcriptional regulator | 2.18 | 5.68E-06 |
| *carB* | carbamoyl-phosphate synthase large subunit | 2.16 | 2.60E-13 |
| pgap_annot_000808 | putative Ig domain-containing protein | 2.04 | 3.81E-05 |
| pgap_annot_001715 | ABC transporter permease | 2.02 | 0.00040195 |
| pgap_annot_002102 | aspartate-semialdehyde dehydrogenase | 1.97 | 6.37E-05 |
| *potE* | putrescine-ornithine antiporter | 1.95 | 0.00015689 |
| *pyrF* | orotidine-5'-phosphate decarboxylase | 1.93 | 8.53E-11 |
| pgap_annot_000581 | transglycosylase | 1.83 | 1.30E-05 |
| pgap_annot_000511 | N-acetyltransferase | 1.82 | 0.00032886 |
| pgap_annot_001507 | diacylglycerol kinase family lipid kinase | 1.82 | 8.60E-08 |
| *speC* | ornithine decarboxylase | 1.81 | 5.42E-07 |
| pgap_annot_000527 | urease subunit beta | 1.78 | 3.60E-05 |
| *manA* | mannose-6-phosphate isomerase%2C class I | 1.77 | 0.00316932 |
| pgap_annot_001890 | NCS2 family nucleobase:cation symporter | 1.77 | 8.41E-05 |
| *ureC* | urease subunit alpha | 1.76 | 1.35E-05 |
| *ureF* | urease accessory protein UreF | 1.66 | 0.00270695 |
| *opp3C* | ABC transporter permease | 1.64 | 2.38E-05 |
| *dapA* | 4-hydroxy-tetrahydrodipicolinate synthase | 1.63 | 0.00182306 |
| *alsS* | acetolactate synthase AlsS | 1.61 | 5.21E-08 |
| pgap_annot_001936 | YfhO family protein | 1.61 | 0.0009502 |
| pgap_annot_001717 | ABC transporter ATP-binding protein | 1.59 | 0.00179133 |
| *pyrE* | orotate phosphoribosyltransferase | 1.59 | 5.57E-05 |
| pgap_annot_001659 | NifU family protein | 1.59 | 0.00134961 |
| *arcA* | arginine deiminase | 1.58 | 0.00084976 |
| pgap_annot_001982 | hypothetical protein | 1.58 | 0.00060342 |
| *msaA* | regulatory protein MsaA | 1.57 | 0.00151161 |
| pgap_annot_000585 | hypothetical protein | 1.56 | 0.00253255 |
| pgap_annot_002090 | 5-bromo-4-chloroindolyl phosphate hydrolysis family protein | 1.53 | 3.09E-06 |
| *ureE* | urease accessory protein UreE | 1.53 | 1.10E-05 |
| pgap_annot_001340 | branched-chain amino acid aminotransferase | 1.50 | 0.00037747 |

Table S4- *S. lugdunensis* genes differentially repressed by *C. acnes* cell-free conditioned media (CFCM)

| Gene | Product | fold | pvalue |
| --- | --- | --- | --- |
| *purM* | phosphoribosylformylglycinamidine cyclo-ligase | -4.007 | 5.00E-50 |
| *purF* | amidophosphoribosyltransferase | -3.93 | 6.23E-37 |
| *purN* | phosphoribosylglycinamide formyltransferase | -3.90 | 4.31E-23 |
| *purL* | phosphoribosylformylglycinamidine synthase subunit PurL | -3.70 | 2.25E-26 |
| *purH* | bifunctional phosphoribosylaminoimidazolecarboxamide formyltransferase/IMP cyclohydrolase | -3.45 | 3.66E-44 |
| *purQ* | phosphoribosylformylglycinamidine synthase I | -3.40 | 2.38E-14 |
| *purC* | phosphoribosylaminoimidazolesuccinocarboxamide synthase | -3.20 | 5.45E-16 |
| *purS* | phosphoribosylformylglycinamidine synthase subunit PurS | -3.17 | 0.000130919 |
| *purD* | phosphoribosylamine--glycine ligase | -2.71 | 5.62E-26 |
| pgap_annot_001339 | NAD-dependent epimerase/dehydratase family protein | -2.65 | 4.90E-10 |
| *pbuX* | nucleobase:cation symporter-2 family protein | -2.43 | 1.26E-10 |
| *acnA* | aconitate hydratase AcnA | -2.42 | 2.80E-29 |
| pgap_annot_001057 | NEAT domain-containing protein | -2.40 | 1.22E-06 |
| *xpt* | xanthine phosphoribosyltransferase | -2.36 | 1.12E-14 |
| *purK* | 5-(carboxyamino)imidazole ribonucleotide synthase | -2.28 | 2.78E-05 |
| *glnA* | type I glutamate--ammonia ligase | -2.24 | 2.94E-17 |
| pgap_annot_000491 | L-lactate permease | -2.16 | 2.30E-06 |
| pgap_annot_002003 | MerR family transcriptional regulator | -2.12 | 5.29E-11 |
| *purE* | 5-(carboxyamino)imidazole ribonucleotide mutase | -2.01 | 1.02E-05 |
| *glmS* | glutamine--fructose-6-phosphate transaminase (isomerizing) | -2.00 | 1.11E-16 |
| pgap_annot_000196 | ammonium transporter | -1.97 | 3.19E-10 |
| pgap_annot_000690 | GNAT family N-acetyltransferase | -1.87 | 2.15E-09 |
| pgap_annot_000686 | D-lactate dehydrogenase | -1.75 | 1.93E-07 |
| *glpT* | glycerol-3-phosphate transporter | -1.73 | 1.85E-05 |
| *guaA* | glutamine-hydrolyzing GMP synthase | -1.72 | 0.000562212 |
| pgap_annot_000397 | NCS2 family permease | -1.70 | 5.82E-09 |
| pgap_annot_000544 | sucrose-specific PTS transporter subunit IIBC | -1.68 | 1.75E-05 |
| pgap_annot_001042 | iron-siderophore ABC transporter substrate-binding protein | -1.67 | 1.49E-05 |
| pgap_annot_001510 | DMT family transporter | -1.66 | 2.77E-08 |
| pgap_annot_000659 | MFS transporter | -1.651 | 1.83E-07 |
| *guaB* | IMP dehydrogenase | -1.63 | 3.99E-10 |
| *isdC* | heme uptake protein IsdC | -1.62 | 4.65E-07 |
| pgap_annot_001514 | ABC transporter permease | -1.61 | 0.001637632 |
| *menI* | thioesterase family protein | -1.60 | 4.76E-08 |
| pgap_annot_000023 | hypothetical protein | -1.59 | 0.000533149 |
| pgap_annot_001325 | class I SAM-dependent methyltransferase | -1.59 | 2.07E-05 |
| *mntC* | zinc ABC transporter substrate-binding protein | -1.58 | 1.06E-05 |
| *nrdD* | anaerobic ribonucleoside-triphosphate reductase | -1.58 | 9.44E-06 |
| pgap_annot_000304 | HAD family hydrolase | -1.57 | 5.05E-07 |
| *gpmI* | 2%2C3-bisphosphoglycerate-independent phosphoglycerate mutase | -1.56 | 0.003216295 |
| *pxpA* | 5-oxoprolinase subunit PxpA | -1.53 | 0.000158827 |
| pgap_annot_000729 | glycosyltransferase | -1.52 | 0.00032048 |
| pgap_annot_001595 | GNAT family N-acetyltransferase | -1.52 | 0.000893037 |
| pgap_annot_000198 | YeeE/YedE family protein | -1.51 | 0.000234365 |
| *trmB* | tRNA (guanosine(46)-N7)-methyltransferase TrmB | -1.50 | 0.001195066 |
